# Supplementary material
Source: Springer Nature journal article supplement (https://www.springermedizin.de/resource/supplementary/12931_2013_1425_MOESM6_ESM.pdf/9425968)

N-cadherin/E-cadherin

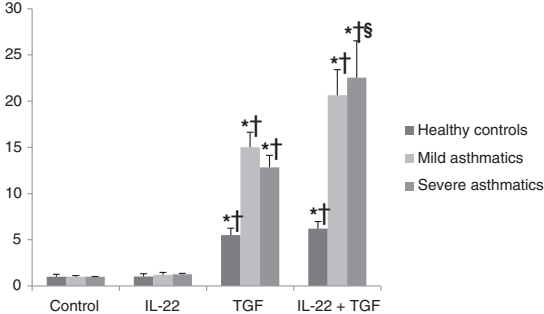

Supplement: MOESM6 [file 9425968]
